# Supplementary material for: Identification of DNA nucleotides by conductance and tunnelling current variation through borophene nanogaps
Source: Royal Society of Chemistry journal article supplement (doi:10.1039/d2cp02093a), 2022-01-01
Supplement: d2cp02093a1.pdf [file d2cp02093a1.pdf]

## *Supporting Information*

### **Identification of DNA Nucleotides by Conductance and Tunnelling Current Variation through Borophene Nanogap**

Milan Kumar Jena, Biswarup Pathak\*

Department of Chemistry, Indian Institute of Technology Indore, Indore, Madhya Pradesh, 453552, India

\*E-mail: [biswarup@iiti.ac.in](mailto:biswarup@iiti.ac.in)

#### **Contents:**

1. Schematic representation of fully optimized structures of all the four nucleotides (dAMP, dTMP, dGMP, and dCMP) at different orientations ( $0^\circ$  to  $180^\circ$  in the step of  $30^\circ$ ) in yz plane along the x-axis.
2. Relative energy (in eV) table of the rotated configurations of all the four nucleotides inside the borophene nanogap around the x-axis in the yz-plane in the steps of  $30^\circ$ .
3. To check the nanogap width effect on the transmission, the gap size from increased  $12.6 \text{ \AA}$  to  $14.6 \text{ \AA}$  (H to H distance) for all four DNA nucleotides.
4. Scheme of dAMP nucleotide translated in-plane along the z-axis in positive and negative directions by  $\pm 0.5 \text{ \AA}$  inside the borophene nanogap.
5. Scheme of dAMP nucleotide translated out-of-plane along the x-axis in positive and negative directions by  $\pm 1.0 \text{ \AA}$  for borophene nanogap.
6. Zero-bias transmission function for all four nucleotides (dAMP, dTMP, dGMP, and dCMP) inside the borophene nanogap.
7. Eigenchannel wavefunctions for all the four borophene nanogap+nucleotides at a specific energy value of  $-1.750 \text{ eV}$ .

1. Schematic representation of fully optimized structures of all the four nucleotides (dAMP, dTMP, dGMP, and dCMP) at different orientations ( $0^\circ$  to  $180^\circ$  in the step of

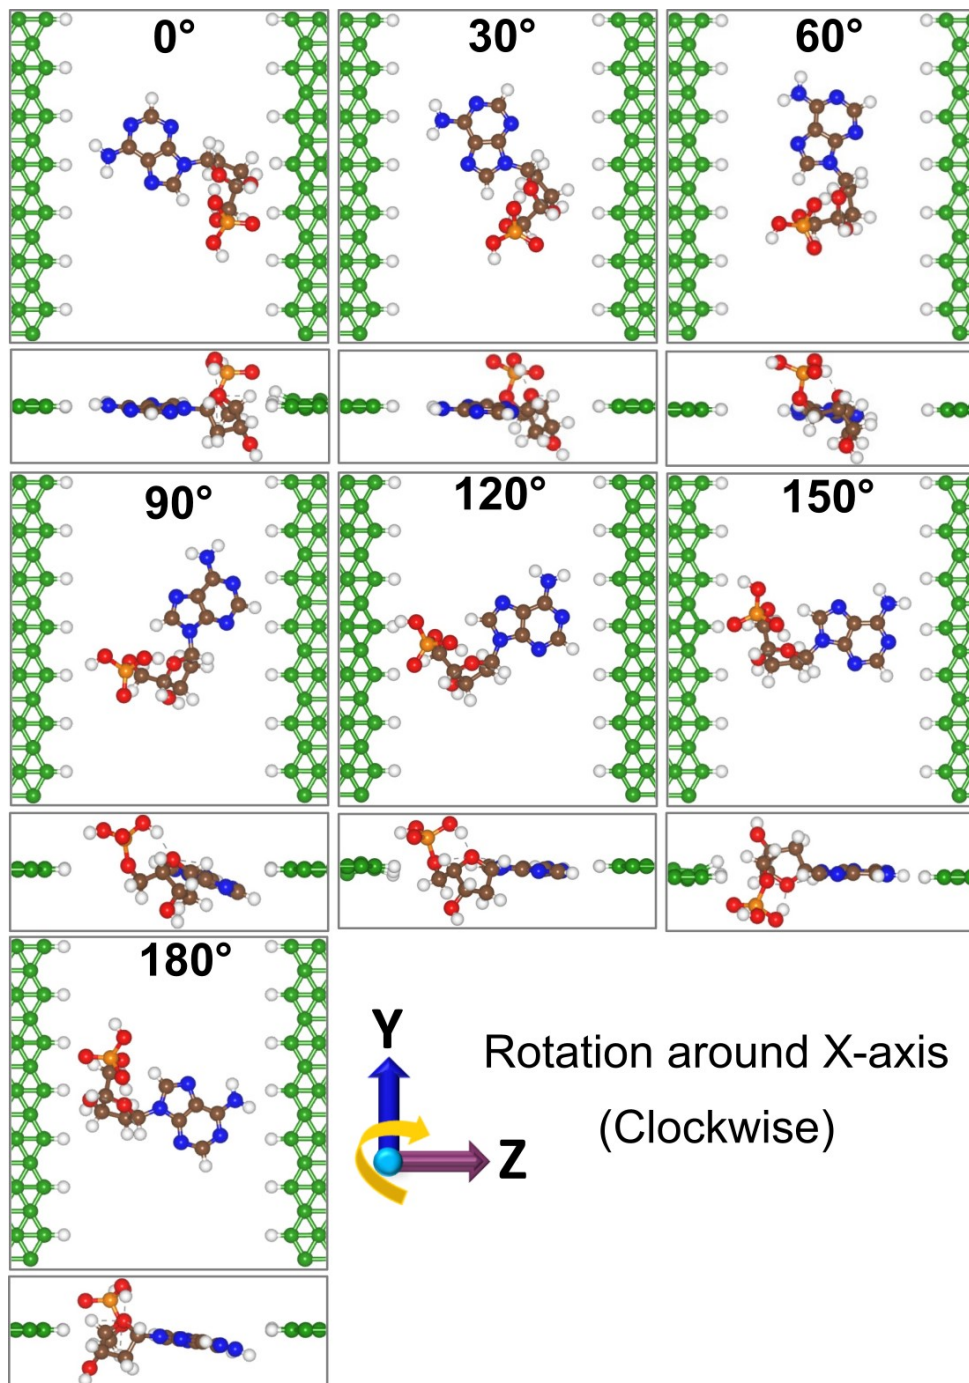

$30^\circ$ ) in yz plane along the x-axis.

**Figure S1.** The schematic representations (top and side views) of fully relaxed structures of dAMP at 0°, 30°, 60°, 90°, 120°, 150°, and 180°.

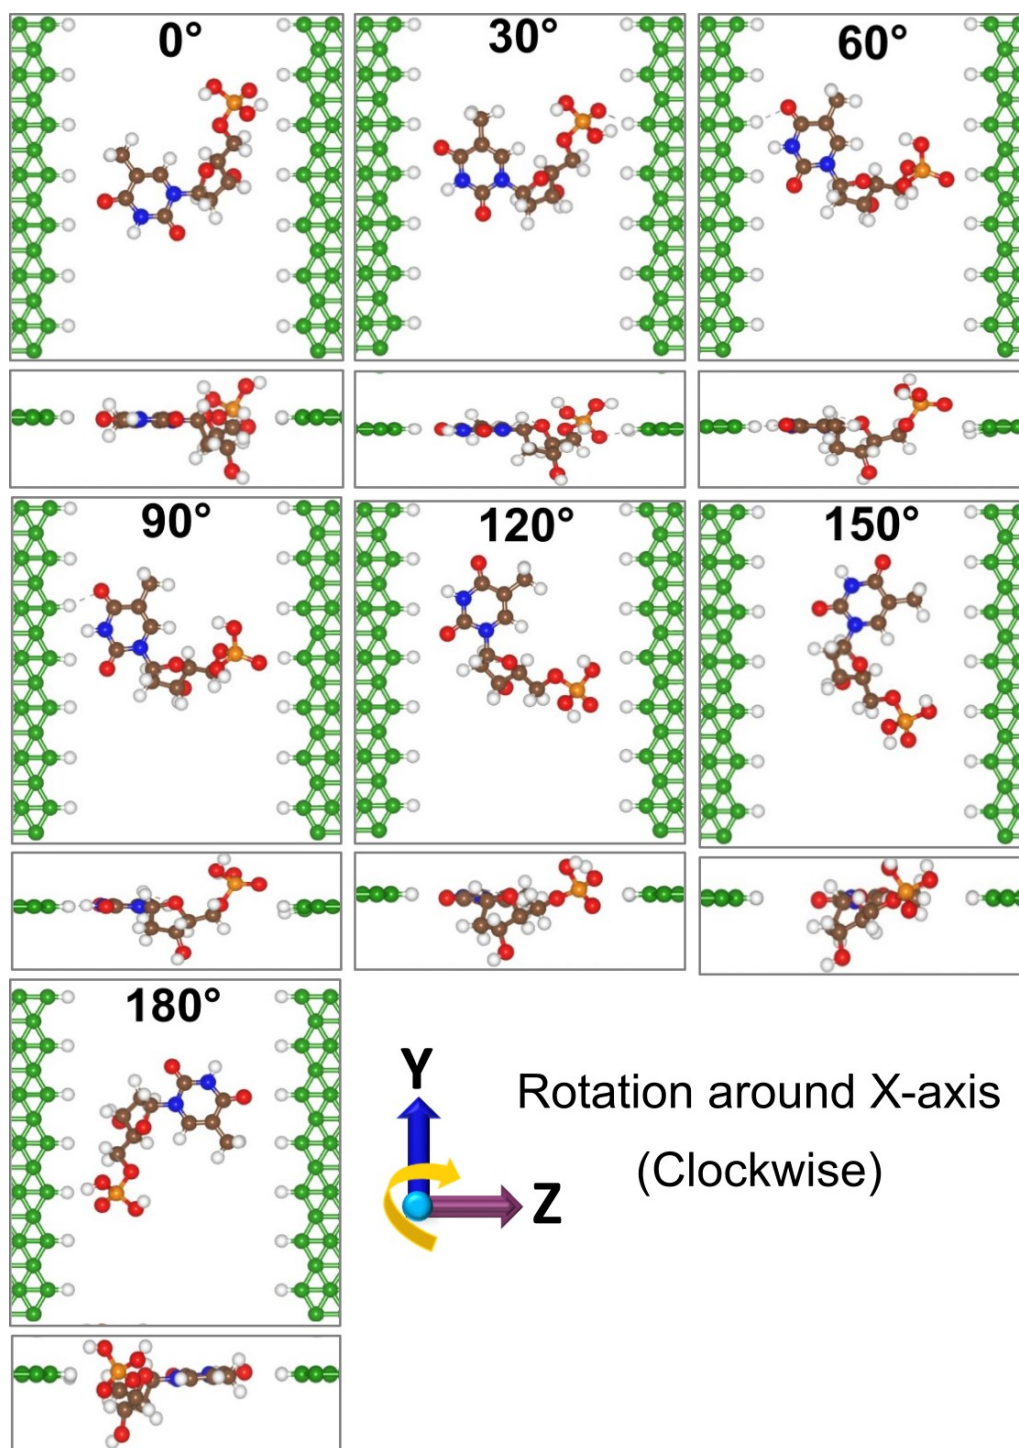

**Figure S2.** The schematic representations (top and side views) of fully relaxed structures of dTMP at 0°, 30°, 60°, 90°, 120°, 150°, and 180°.

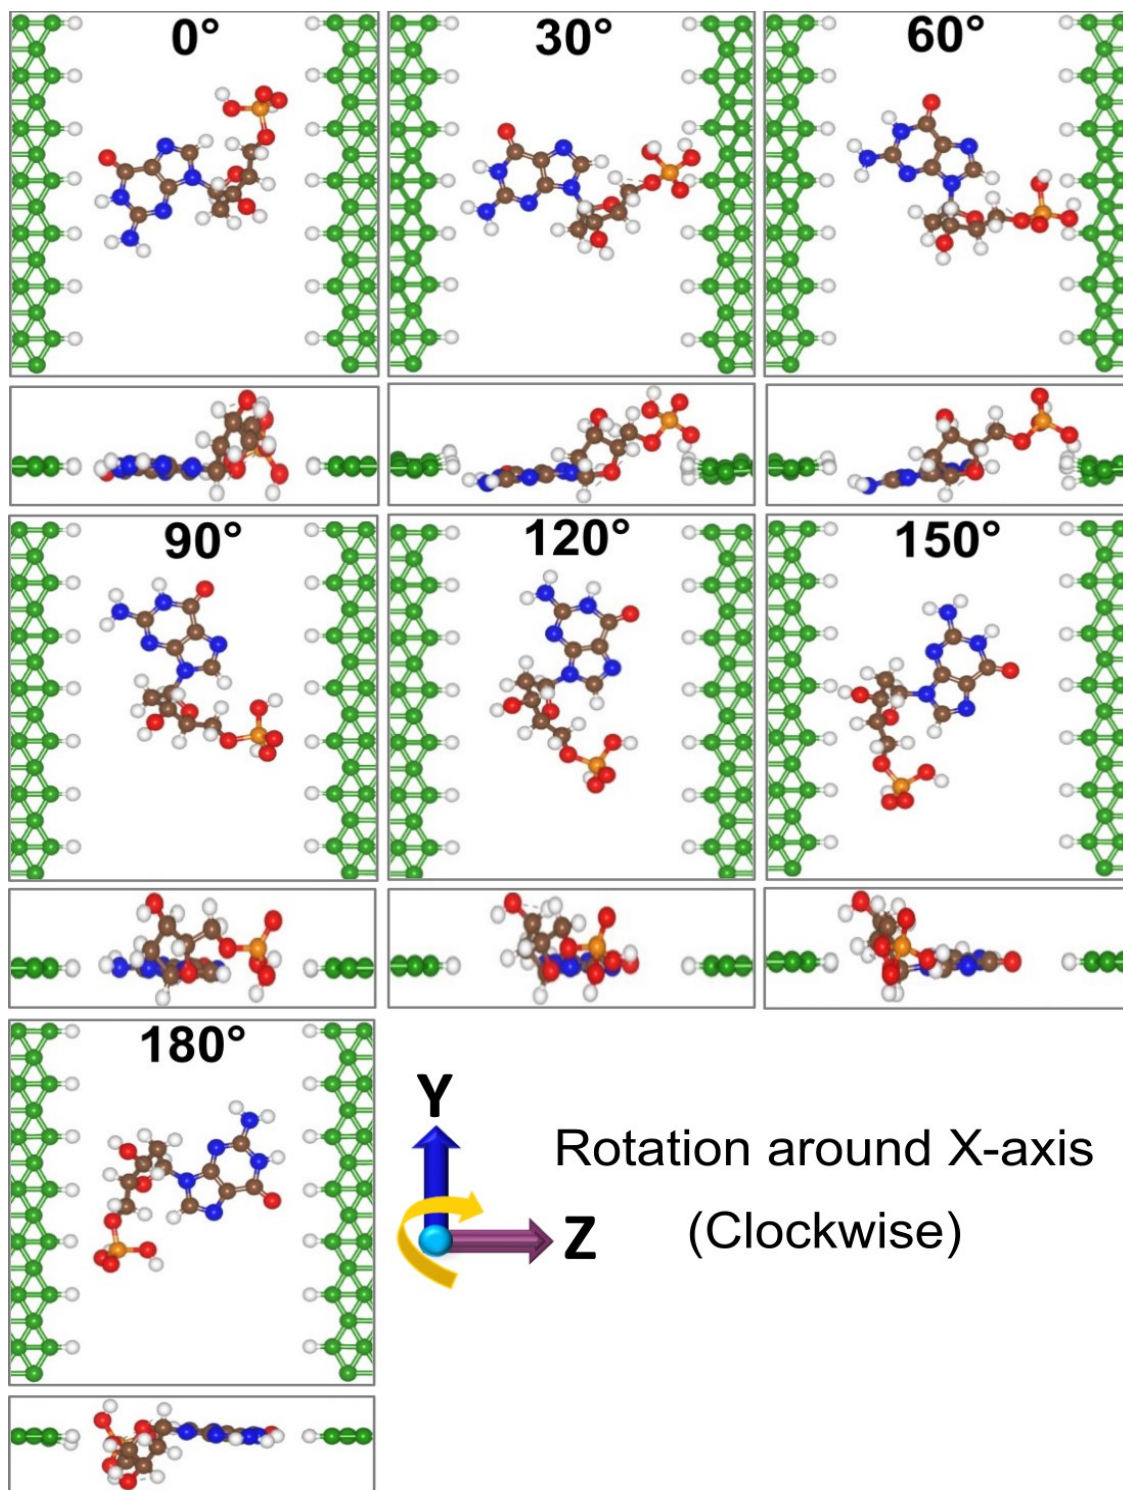

**Figure S3.** The schematic representations (top and side views) of fully relaxed structures of dGMP at 0°, 30°, 60°, 90°, 120°, 150°, and 180°.

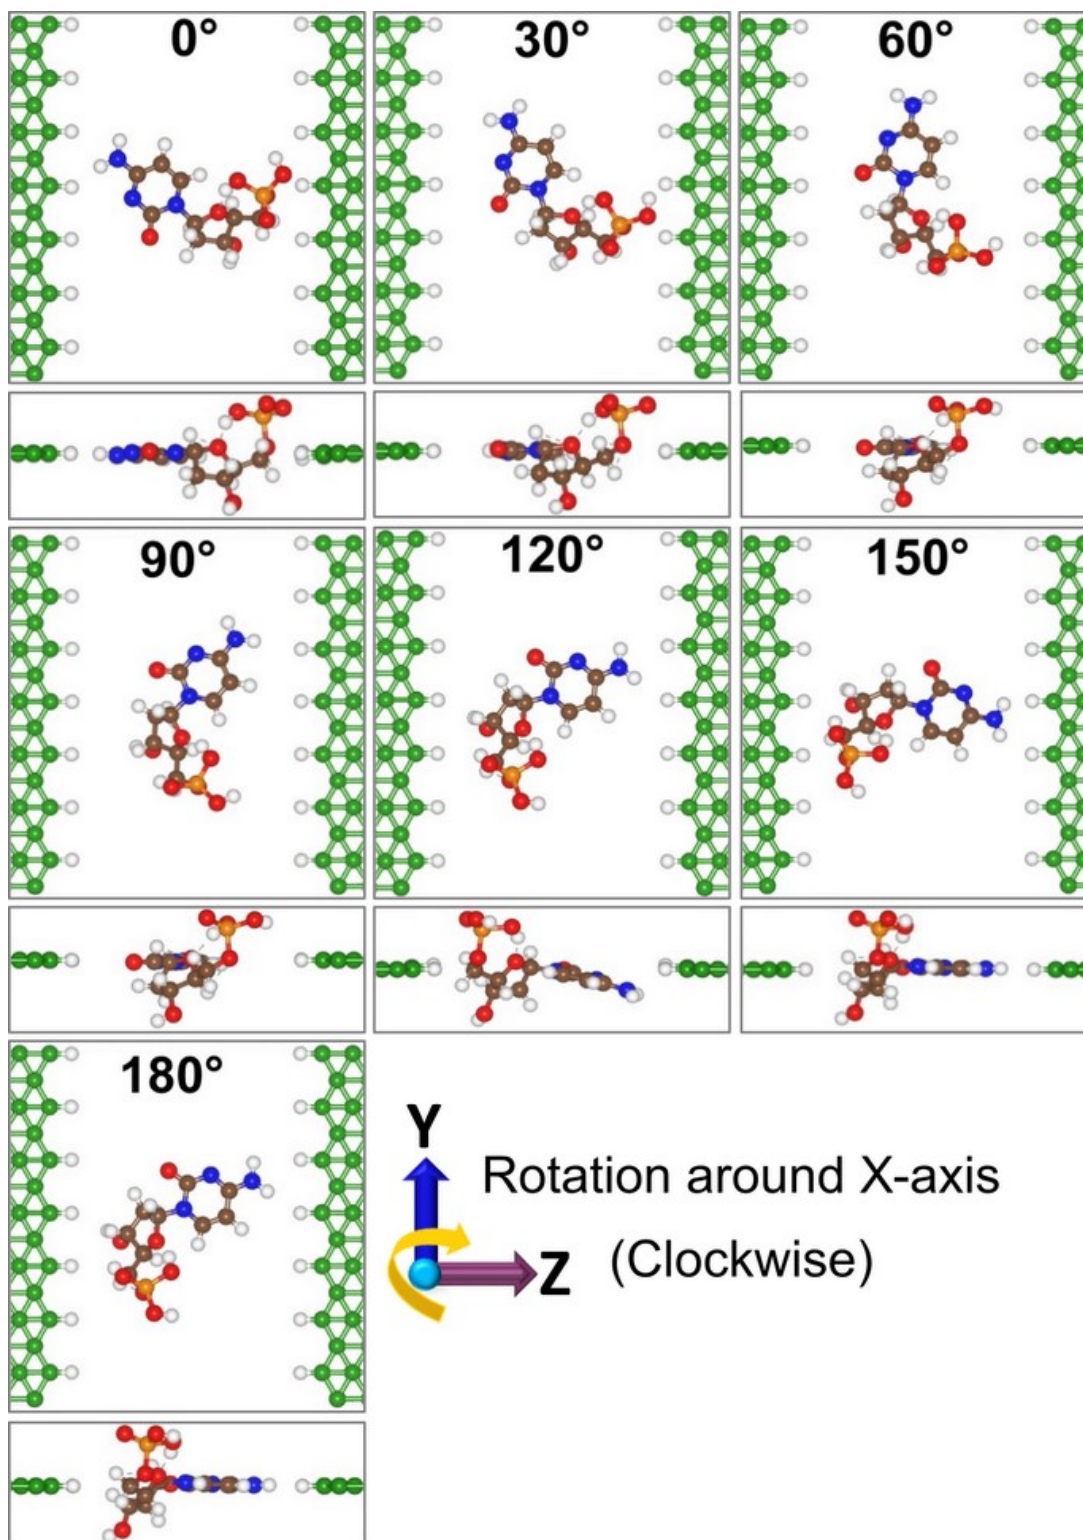

**Figure S4.** The schematic representations (top and side views) of fully relaxed structures of dCMP at  $0^\circ$ ,  $30^\circ$ ,  $60^\circ$ ,  $90^\circ$ ,  $120^\circ$ ,  $150^\circ$ , and  $180^\circ$ .

**2. Relative energy (in eV) table of the rotated configurations of all the four nucleotides in the borophene nanogap around x-axis in yz-plane in the steps of 30°.**

| <b>Systems/<br/>Rotations (°)</b> | <b>0°</b> | <b>30°</b> | <b>60°</b> | <b>90°</b> | <b>120°</b> | <b>150°</b> | <b>180°</b> |
|-----------------------------------|-----------|------------|------------|------------|-------------|-------------|-------------|
| <b>dAMP</b>                       | 0.20      | 0.08       | 0.16       | 0.56       | <b>0</b>    | 0.02        | 0.40        |
| <b>dTMP</b>                       | <b>0</b>  | 0.14       | 0.13       | 0.13       | 0.56        | 0.18        | 0.13        |
| <b>dGMP</b>                       | 0.14      | <b>0</b>   | 0.23       | 0.47       | 0.65        | 0.51        | 0.09        |
| <b>dCMP</b>                       | <b>0</b>  | 0.02       | 0.32       | 0.36       | 0.17        | 0.14        | 0.15        |

**Table S1.** The calculated relative energy (in eV) of all the four nucleotides with respect to the in-plane rotated configuration.

3. To check the nanogap width effect on the transmission function, the gap size from increased  $12.6 \text{ \AA}$  to  $14.7 \text{ \AA}$  (H to H distance) for all the four DNA nucleotides.

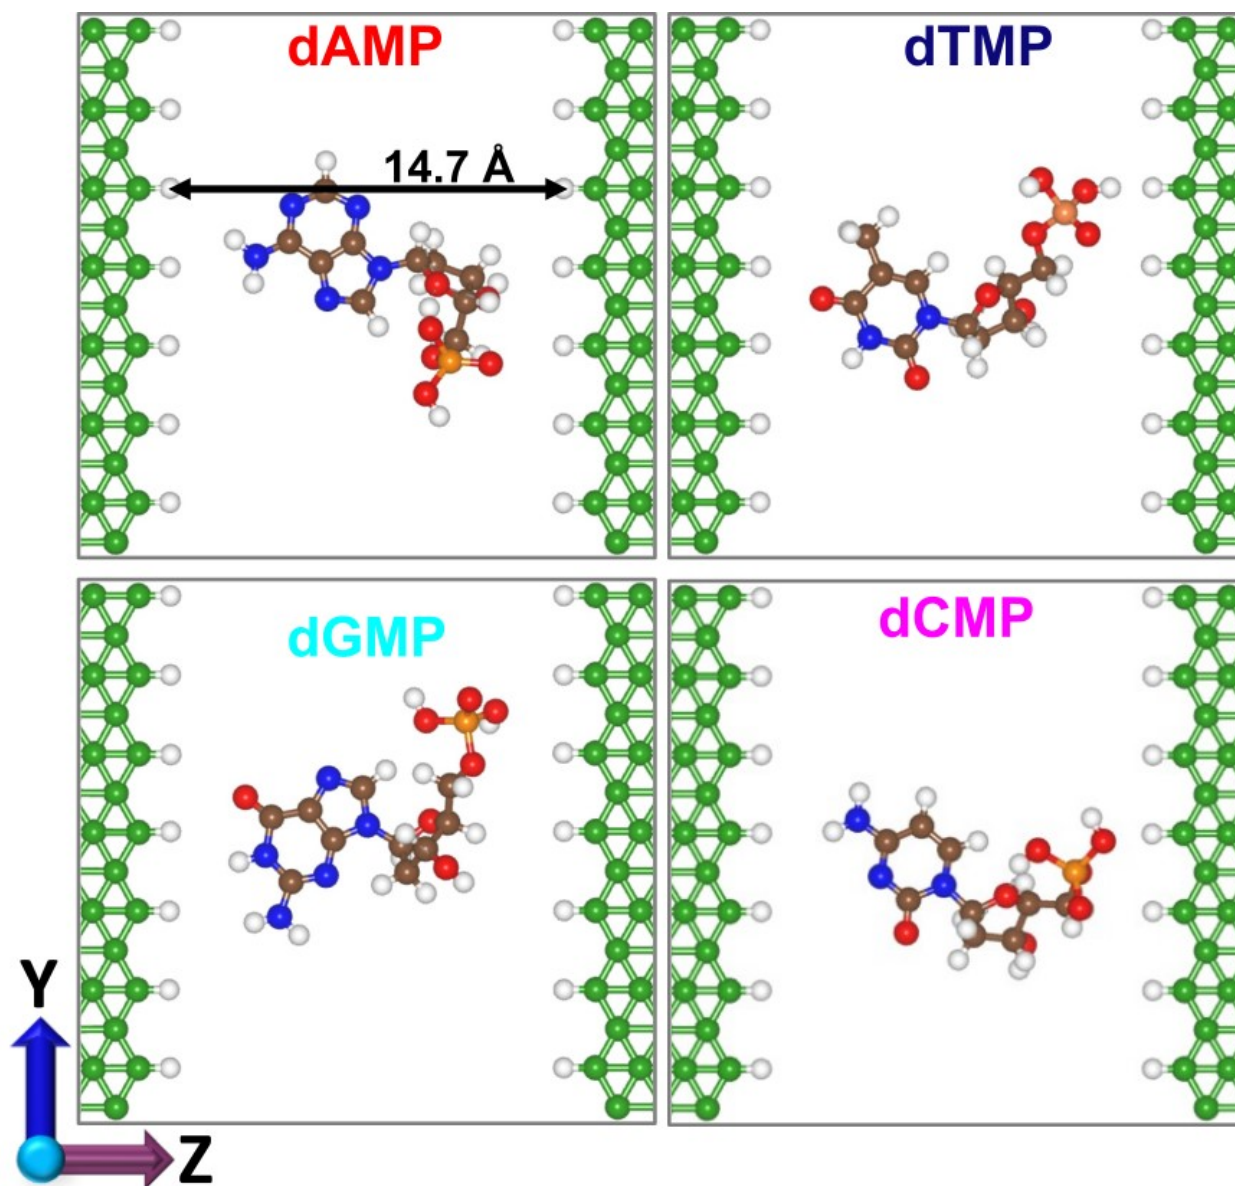

**Figure S5.** The schematic representations of the fully relaxed structure of all the four nucleotides when the nanogap width increased from  $12.6 \text{ \AA}$  to  $14.6 \text{ \AA}$ .



4. Scheme of dAMP nucleotide translated in-plane along the z-axis in positive and negative directions by  $\pm 0.5 \text{ \AA}$  both inside the borophene nanogap.

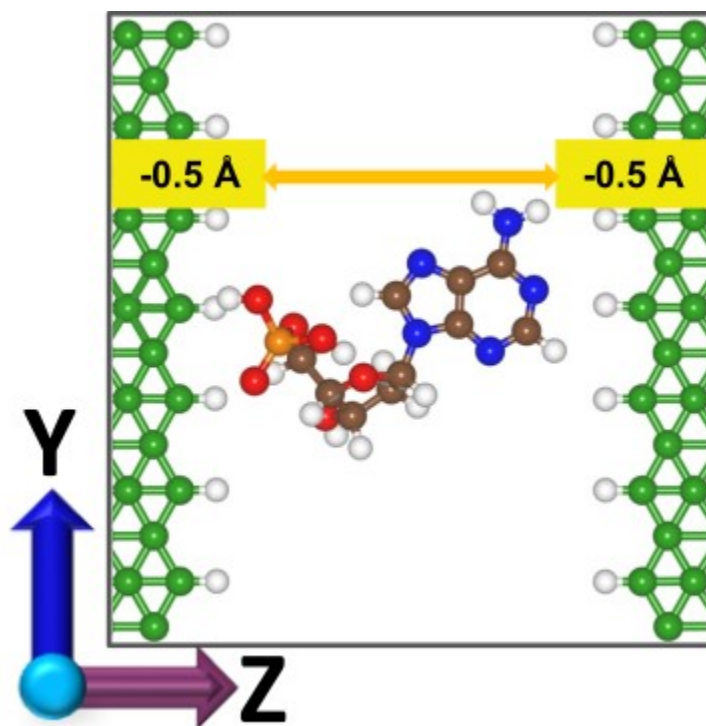

**Figure S6.** The schematic representations of dAMP nucleotide translated in-plane along the z-axis in positive and negative directions by  $\pm 0.5 \text{ \AA}$ .

5. Scheme of dAMP nucleotide translated out-of-plane along the x-axis in positive and negative directions by  $\pm 1.0 \text{ \AA}$  for borophene nanogap.

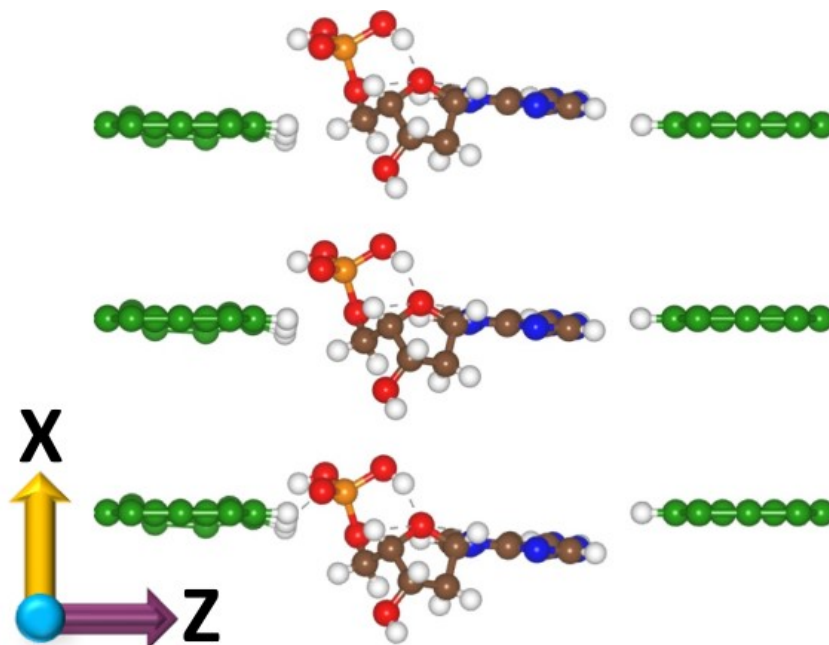

**Figure S7.** The schematic representations of dAMP nucleotide translated out-of-plane along the x-axis in positive and negative directions by  $\pm 1.0 \text{ \AA}$ .

6. Zero-bias transmission function for all four nucleotides (dAMP, dTMP, dGMP, and dCMP) inside the borophene nanogap.

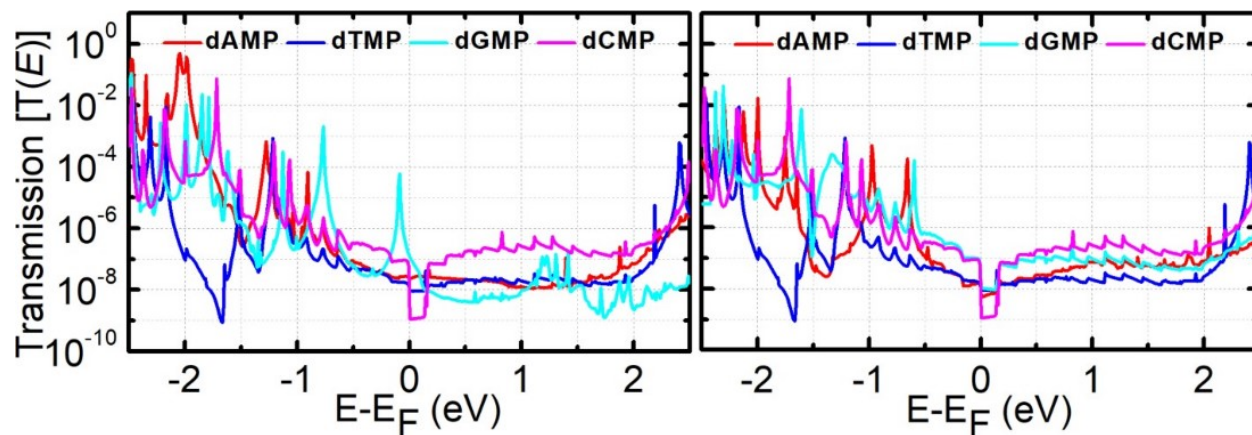

**Figure S8.** Zero-bias transmission function for all four nucleotides (dAMP, dTMP, dGMP, and dCMP) inside the borophene nanogap at their most stable and  $0^\circ$  orientation.

7. Eigenchannel wavefunctions for all the four borophene nanogap+nucleotides at a specific energy value of -1.750 eV.

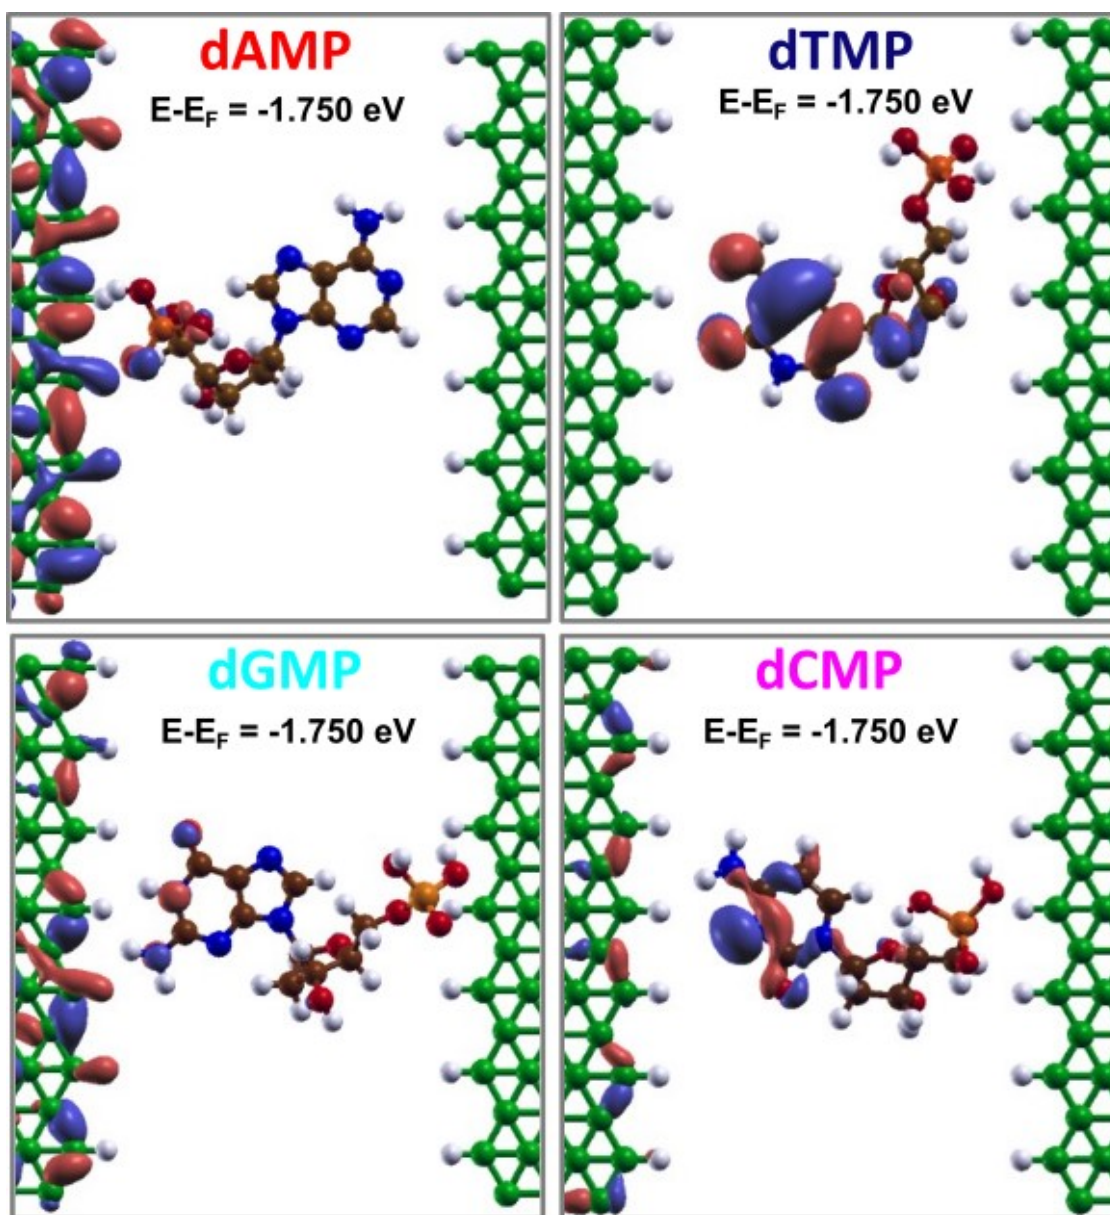

**Figure S9.** Eigenchannel wavefunctions for all the four borophene nanogap+nucleotides at a specific energy value of -1.750 eV below the Fermi level (isosurface value is  $0.09$  e/Å<sup>3</sup>). The negative lobes are in blue and the positive in red colors, respectively.
